# Supplementary material for: Intradermal immunisation using the TLR3-ligand Poly (I:C) as adjuvant induces mucosal antibody responses and protects against genital HSV-2 infection
Source: PubMed Central journal article supplement (PMC5707913; doi:10.1038/npjvaccines.2016.10), 2016-08-25
Supplement: npjvaccines201610-s2.pdf [file npjvaccines201610-s2.pdf]

### Supplemental Figure 3. E. Bardel *et al.*

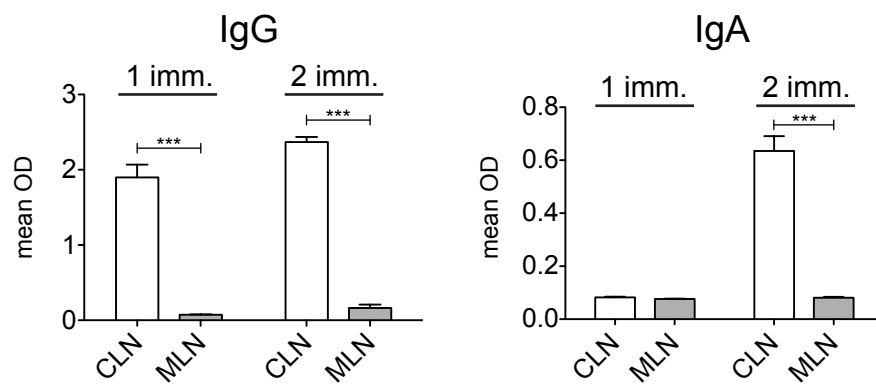

#### Supplemental Figure 3.

**HIV gp140-specific IgA antibodies can be detected in cLN cells supernatants after the second ID immunization.** Mice were immunized once or twice (2 weeks interval) with gp140+Poly(I:C) and gD-specific IgG and IgA were titrated in 3 day culture supernatants of cLN and mLN cells ( $10^6$ /well) cultured without stimulation *in vitro*. Results are expressed as mean + SEM and derived from 6 determinations. Statistics were performed using unpaired *t* test with Welch's correction.
